# Supplementary material
Source: PubMed Central journal article supplement (PMC7006962)
Supplement: ac9b03037_si_001.pdf [file ac9b03037_si_001.pdf]

# ***Supporting information: Synthetic Cannabinoid Receptor Agonist Detecting Using Fluorescence Spectral Fingerprinting***

Benedict May<sup>1</sup>, Husain A. Naqi<sup>2</sup>, Michael Tipping<sup>3</sup>, Jenny Scott<sup>2</sup>, Stephen M. Husbands<sup>2,4</sup>, Ian S. Blagbrough<sup>2,4</sup>, and Christopher R. Pudney<sup>1,4\*</sup>

<sup>1</sup>Department of Biology and Biochemistry, <sup>2</sup>Department of Pharmacy and Pharmacology, <sup>3</sup>Department of Computer Science, <sup>4</sup>Centre for Therapeutic Innovation, <sup>5</sup>Centre for Biosensors, Bioelectronics and Biodevices, University of Bath, Bath BA2 7AY, UK

**Contents**

|               |            |                                                                      |     |
|---------------|------------|----------------------------------------------------------------------|-----|
| <b>Table</b>  | <b>S1.</b> | A range of species comprising different SCRAAs.....                  | S-3 |
| <b>Table</b>  | <b>S2.</b> | Results of fitting Eq 1 to saliva FSFs.....                          | S-4 |
| <b>Figure</b> | <b>S1.</b> | Concentration dependence of AM-694 (MeOH) FSFs.....                  | S-5 |
| <b>Figure</b> | <b>S2.</b> | Concentration dependence of AB-FUBINACA (H <sub>2</sub> O) FSFs..... | S-6 |
| <b>Figure</b> | <b>S3.</b> | Effect of solvent on SF-ADB FSF.....                                 | S-7 |
| <b>Figure</b> | <b>S4.</b> | Concentration dependence of AM-694 (H <sub>2</sub> O) FSFs.....      | S-8 |
| <b>Figure</b> | <b>S5.</b> | Individual FSFs for saliva participant samples.....                  | S-9 |

## Tables

**Table S1.** A range of species comprising different SCRA.

| Core        | Core substituent                                                             | Tail                             | Linker      | Ring            | Ring substituent                                                                            |
|-------------|------------------------------------------------------------------------------|----------------------------------|-------------|-----------------|---------------------------------------------------------------------------------------------|
| indole      | 2-methyl                                                                     | 2-morpholin-4-yl ether           | methanone   | carbamoyl       | Isopropyl<br>tert-butyl                                                                     |
| indazole    |                                                                              | tetrahydropyran-4-yl methyl      | ethanone    | methoxycarbonyl | tert-butyl                                                                                  |
| Pyrrrole    | 5-phenyl,<br>5-(2-methyl)phenyl,<br>5-(2-fluoro)phenyl,<br>5-(3-bromo)phenyl | methylazepan-3-yl                | carboxamide | CUMYL           |                                                                                             |
| naphthalene |                                                                              | methylpiperidin-2-yl methyl      | Carboxylate | naphthyl        | 4-methoxy,<br>2-chloro,<br>4-methyl,<br>4-ethyl,<br>4-propyl,<br>4-fluoro,<br>4-bromo       |
| γ-carboline |                                                                              | fluorobenzyl                     |             | adamantly       |                                                                                             |
| γ-carboline |                                                                              | fluorobenzyl<br>cyclohexylmethyl |             | cyclopropyl     | 2,2,3,3-tetramethyl                                                                         |
|             |                                                                              | heptyl                           |             | Q<br>quinolinyl |                                                                                             |
|             |                                                                              | hexyl                            |             | phenyl          | 2-methyl (ring-substituent),<br>2-ethyl,<br>2-methoxy,<br>4-methoxy,<br>2-iodo,<br>2-chloro |
|             |                                                                              | 5-bromopentyl                    |             |                 |                                                                                             |
|             |                                                                              | 5-chloropentyl                   |             |                 |                                                                                             |
|             |                                                                              | 5-fluoropentyl                   |             |                 |                                                                                             |
|             |                                                                              | 4-cyanobutyl                     |             |                 |                                                                                             |
|             |                                                                              | pentoxy                          |             |                 |                                                                                             |
|             |                                                                              | pent-4-enyl                      |             |                 |                                                                                             |
|             |                                                                              | pentyl                           |             |                 |                                                                                             |
|             |                                                                              | butyl                            |             |                 |                                                                                             |
|             |                                                                              | propyl                           |             |                 |                                                                                             |
|             |                                                                              | methyl                           |             |                 |                                                                                             |

Data as found at [http://www.emcdda.europa.eu/topics/pods/synthetic-cannabinoids\\_en](http://www.emcdda.europa.eu/topics/pods/synthetic-cannabinoids_en), with the exception of γ-carboline.

**Table S2.** Results of fitting Eq 1 to saliva FSFs.

|                      | Ave.    | M1      | M2      | M3      | F1      | F2      | F3      |
|----------------------|---------|---------|---------|---------|---------|---------|---------|
| $F_0$                | 0.012   | 0.013   | 0.005   | 0.107   | 0.009   | 0.009   | 0.012   |
| $A_1$ (AU)           | 1.797   | 1.976   | 1.160   | 3.638   | 1.253   | 2.518   | 1.797   |
| $\lambda_{Em1}$ (nm) | 352.146 | 352.732 | 353.048 | 371.002 | 350.911 | 352.073 | 352.146 |
| $\lambda_{Ex1}$ (nm) | 263.836 | 263.604 | 263.972 | 275.479 | 260.692 | 265.731 | 263.836 |
| $w_{1(1)}$ (nm)      | 71.315  | 68.118  | 68.534  | 82.087  | 68.867  | 74.293  | 71.315  |
| $w_{2(1)}$ (nm)      | 25.849  | 21.389  | 25.895  | 38.369  | 22.653  | 30.467  | 25.849  |
| $b_{1(1)}$           | 0.275   | 0.324   | 0.288   | -0.260  | 0.292   | 0.293   | 0.275   |
| $b_{2(1)}$           | 0.494   | 0.724   | 0.635   | -0.167  | 0.577   | 0.576   | 0.494   |
| $A_2$ (AU)           | 0.209   | 0.191   | 0.233   | 0.001   | 0.140   | 0.161   | 0.209   |
| $\lambda_{Em2}$ (nm) | 412.113 | 413.650 | 451.631 | 410.252 | 398.879 | 411.140 | 412.113 |
| $\lambda_{Ex2}$ (nm) | 343.837 | 346.963 | 352.793 | 335.353 | 339.752 | 342.702 | 343.837 |
| $w_{1(2)}$ (nm)      | 167.839 | 83.089  | 124.690 | 114.249 | 132.471 | 128.922 | 167.839 |
| $w_{2(2)}$ (nm)      | 91.948  | 92.466  | 110.934 | 101.011 | 88.429  | 77.344  | 91.948  |
| $b_{1(2)}$           | 0.120   | 0.203   | 0.061   | -0.361  | 0.147   | -0.031  | 0.120   |
| $b_{2(2)}$           | 0.548   | 0.382   | 0.598   | -0.022  | 0.634   | 0.468   | 0.548   |

## Figures

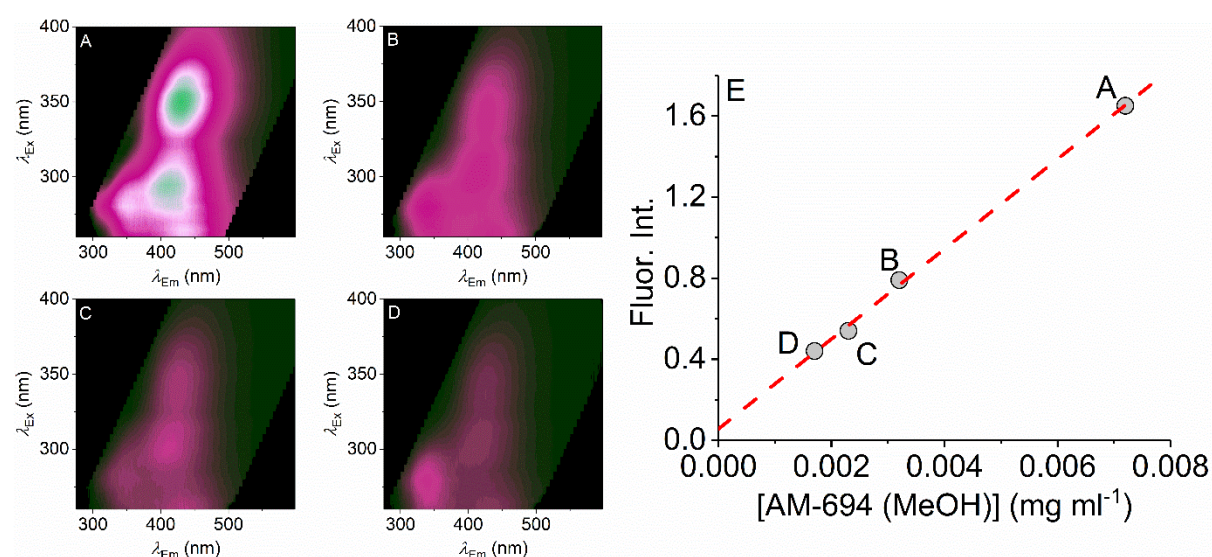

**Figure S1.** Concentration dependence of AM-694 (MeOH) FFSs. **A-D**, FFSs for different concentration of AB FUBINACA with the decreasing concentration shown in panels A  $\rightarrow$  D. **E**, Plot of concentration *versus* peak emission intensity. The red dashed line shows the linear range of the SCRA concentrations with respect to intensity. Colour levels as Figure 2 (relative emission).

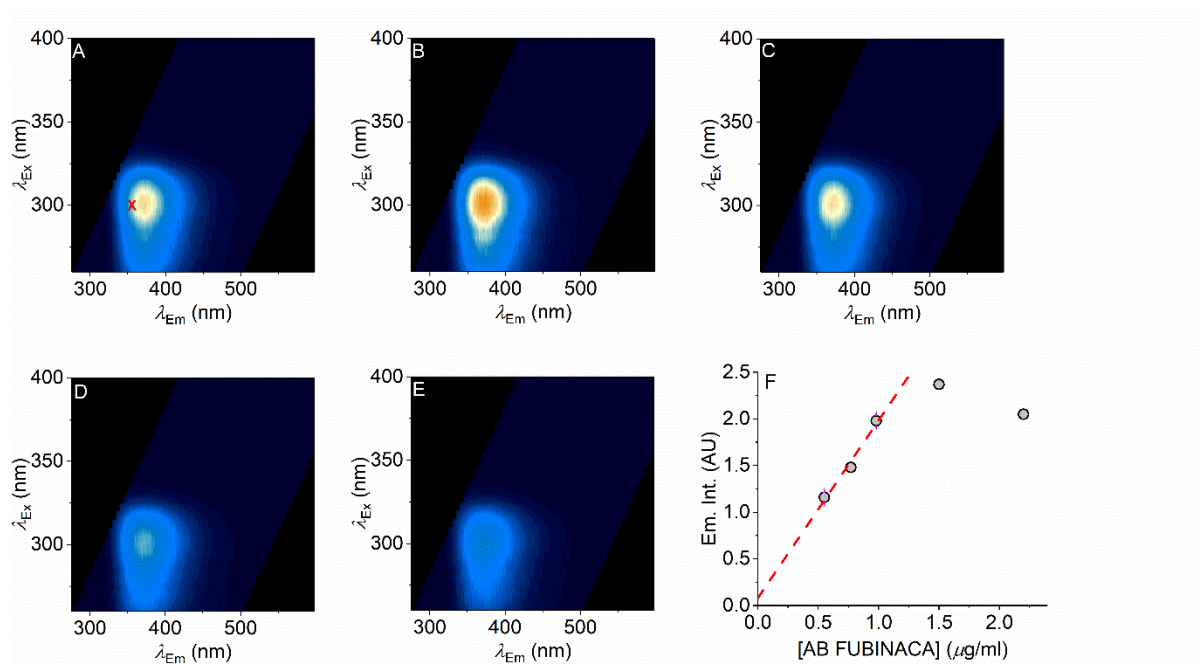

**Figure S2.** Concentration dependence of AB-FUBINACA ( $\text{H}_2\text{O}$ ) FSFs. **A-D**, FSFs for different concentration of AB FUBINACA with the decreasing concentration shown in panels **A**  $\rightarrow$  **E**. **F**, Plot of concentration *versus* peak emission intensity. The red dashed line shows the linear range of the SCRA concentrations with respect to intensity. The red cross in panel **A** shows the peak position of AB FUBINACA in MeOH as in Figure 3D and 4A. Colour levels as Figure 2 (relative emission).

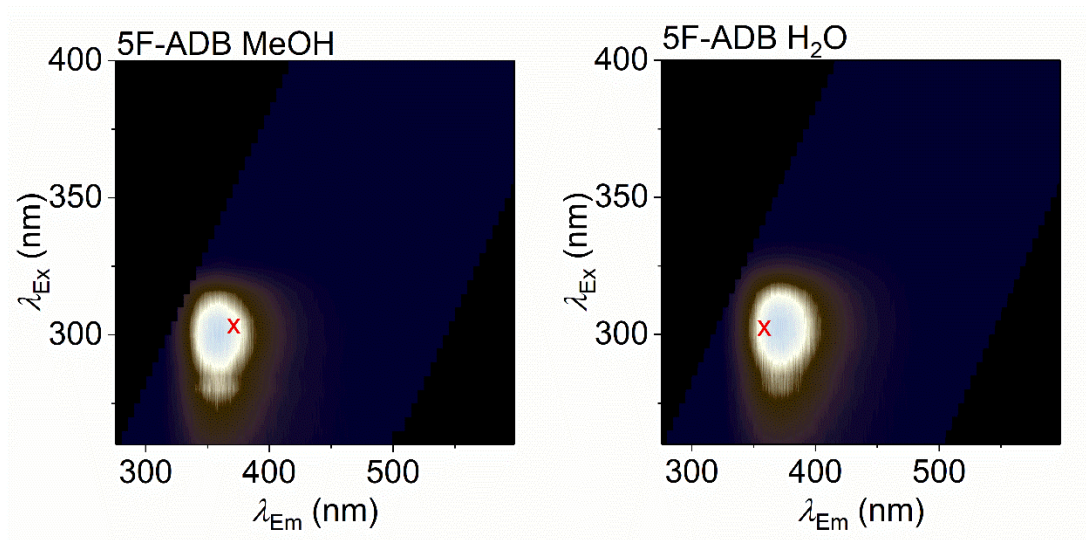

**Figure S3.** Effect of solvent on 5F-ADB FSF. The red crosses represent the peak intensity of the alternative solvent as assessed from fitting each FSF with Eq 1 as in the main text. Colour levels as Figure 2 (relative emission).

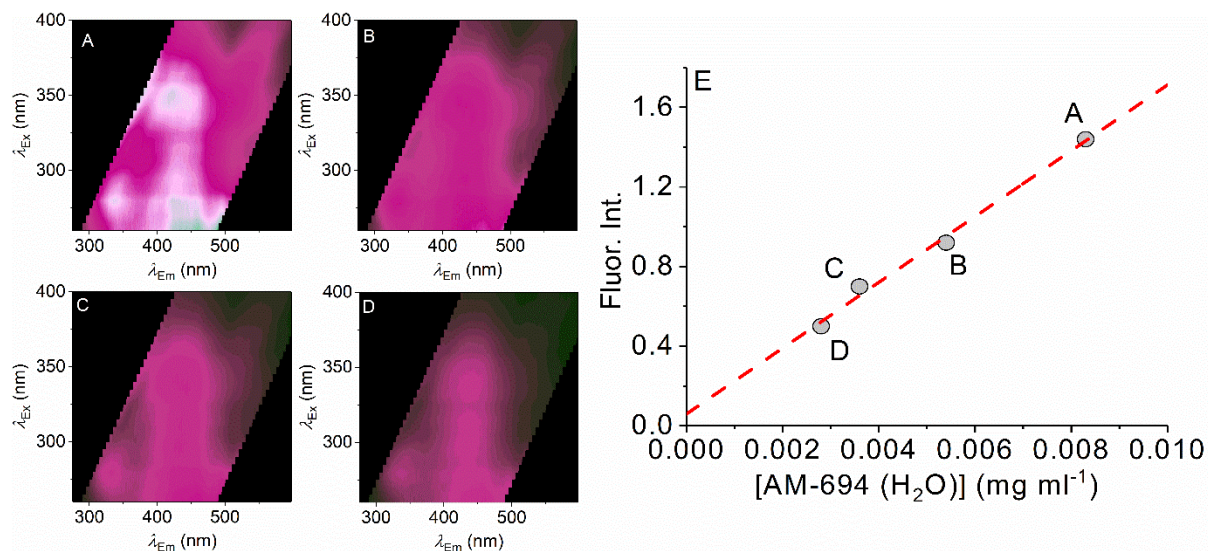

**Figure S4.** Concentration dependence of AM-694 (H<sub>2</sub>O) FSFs. **A-D**, FSFs for different concentration of AB FUBINACA with the decreasing concentration shown in panels A  $\rightarrow$  D. **E**, Plot of concentration *versus* peak emission intensity. The red dashed line shows the linear range of the SCRA concentrations with respect to intensity. Colour levels as Figure 2 (relative emission).



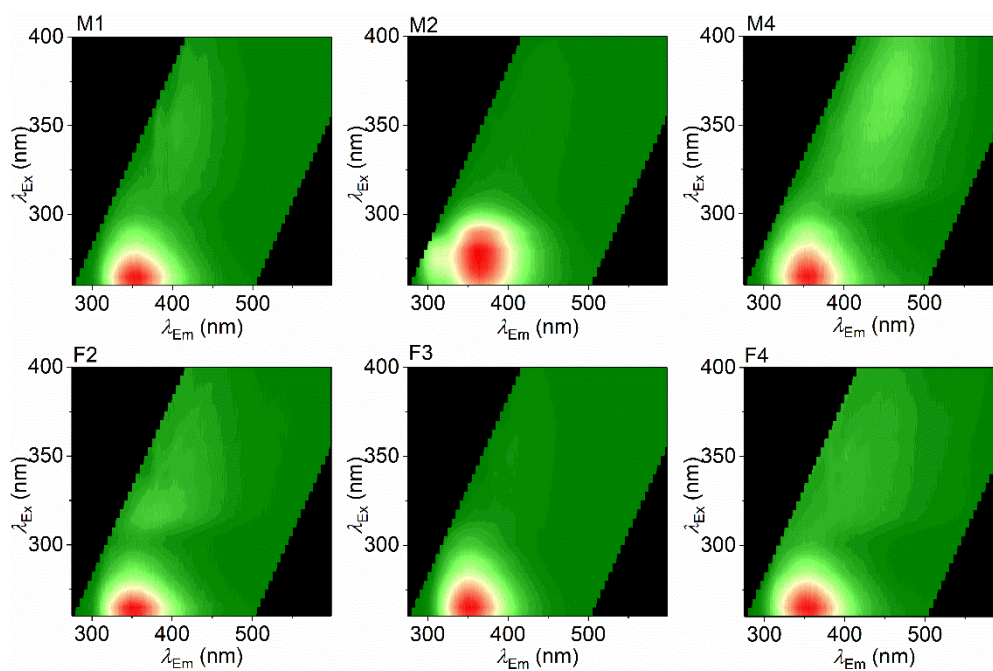

**Figure S5.** Individual FSEs for saliva participant samples. The averaged sample (Figure 6A) is composed of equal volumes of each of the participant samples (male, A-C; female, D-F). Colour levels as Figure 6 (relative emission).
